# Supplementary material
Source: Atypon-hosted journal article supplement (https://archive.jpma.org.pk/PdfDownloadsupplements/742)
Supplement: 742 [file 742]

## Disparities in access to quality surgical care for women in resource-constrained settings: Bottlenecks and the way forward

Usama Waqar,<sup>1</sup> Shaheer Ahmed,<sup>2</sup> Hareem Rauf,<sup>3</sup> Ayesha Nasir Hameed,<sup>4</sup> Hina Inam<sup>5</sup>

### Abstract

Women seeking surgical care are burdened with gender disparities, particularly in resource-limited settings. Such disparities can lead to women often presenting late with advanced disease and poor prognoses. The current narrative review was planned to find evidence for gender disparities, their implications, challenges faced by women seeking surgical care, and strategies to address them. Potentiating from interplay between various societal, sociocultural, and economic barriers, the main challenges included inadequate autonomy, financial constraints, transport and referral issues, lack of experienced women surgeons, privacy concerns, surgeon distrust, and higher thresholds for seeking care. While research revealed these underlying causes, much work remains for governmental healthcare bodies, the international community, surgical leadership, policymakers, surgeons, and family members of patients to act on the highlighted issues. Unrestricted access to quality surgical care for everyone is of vital importance, and can translate into a significant decrease in preventable disabilities and deaths among women in resource-constrained settings.

**Keywords:** Women, Surgery, Healthcare disparities, Sexism.

**DOI:** <https://doi.org/10.47391/JPMA.AKU-17>

### Introduction

Nearly 5 billion patients lack access to quality surgical care worldwide, with a majority of them residing in low- and middle-income countries (LMICs).<sup>1,2</sup> Owing to societal, sociocultural and economic barriers, women in LMICs are disproportionately impacted.<sup>3-5</sup> Rectifying these gender disparities in unmet need for surgical care is imperative to improve women health and prognoses. The current narrative review was planned to find evidence for gender disparities in access to surgical care, to highlight the various challenges faced by women seeking surgical care, and to suggest strategies that can be employed to

.....  
<sup>1,3,4</sup>Medical College, Aga Khan University, Karachi, <sup>2</sup>Medical College, Islamabad Medical & Dental College, Islamabad, <sup>5</sup>Department of Surgery, Aga Khan University Hospital, Karachi, Pakistan.

**Correspondence:** Usama Waqar. Email: [usama.waqar@scholar.aku.edu](mailto:usama.waqar@scholar.aku.edu)

improve the situation.

### Evidence for gender disparity

Nearly 30% of the global burden of disease is attributed to surgical conditions. Despite this, an estimated 5 billion people lack access to safe and affordable surgical care when needed, particularly in LMICs.<sup>2,6-8</sup> While impediments in access to surgical care come from interplay of various social, economic and cultural factors, gender remains among the most pertinent barriers. Significant proportions of women are uneducated in LMICs, making them more vulnerable and dependent on their caregivers. Consequently, women often have limited autonomy in health-seeking decisions.<sup>3-5</sup> Research has shown that most women require permission from their husbands to seek surgical care.<sup>9</sup> This further contributes to gender disparities in access to quality surgical care.

A study conducted in Malawi on general surgery patients concluded that only 31.2% patients seeking surgical care were females. Moreover, women were provided more non-operative interventions when compared to men.<sup>10</sup> These disparities were also highlighted in an Indian study on congenital cardiac surgeries among children with only 37.6% patients being females.<sup>11</sup> Similarly, only 39.9% of all patients seeking surgical care at a global charity in the Republic of Congo were females.<sup>12</sup> Studies from Ethiopia and Ghana on paediatric surgical admissions also demonstrated fewer admissions for female patients compared to males.<sup>13</sup> In Bangladesh and Pakistan, women are less likely to seek surgical treatment for cataract than men.<sup>14,15</sup> Among patients with end-stage renal disease (ESRD) requiring transplantation, women had 11% less access to transplantation than men despite comparable survival benefits, and this difference was more pronounced in older age groups<sup>16</sup> (Table). In addition to access to surgery, gender disparities also exist in quality of perioperative care. A study on patients undergoing wrist arthroscopy found that women were less likely than men to utilise preoperative imaging modalities.<sup>17</sup>

### Implications of gender disparities

The consequences of disparities in access to surgical care can be devastating. Nearly 80% deaths from surgical diseases occur in LMICs, and they are more common

**Table:** Evidence of gender disparity in access to surgical care in resource-limited settings.

| Study                                | Setting                  | Inclusion criteria                                                                       | Gender distribution                      | Additional findings                                                                                                                                                                                                                                                                           |
|--------------------------------------|--------------------------|------------------------------------------------------------------------------------------|------------------------------------------|-----------------------------------------------------------------------------------------------------------------------------------------------------------------------------------------------------------------------------------------------------------------------------------------------|
| Reid et al, 2019 <sup>10</sup>       | Malawi                   | All patients undergoing general surgery                                                  | Males 318 (68.8%), females 133 (31.2%)   | <ul style="list-style-type: none"> <li>• Only 54% of women underwent surgery within 24 hours of presentation compared to 70% of men (P = 0.01).</li> <li>• Women had significantly delayed time to presentation (adjusted mean difference of 136 hours later than men) (P = 0.05).</li> </ul> |
| Chhabra et al, 2016 <sup>11</sup>    | India                    | Children diagnosed with congenital or rheumatic heart disease requiring cardiac surgery  | Males 324 (62.4%), females 195 (37.6%)   | <ul style="list-style-type: none"> <li>• A slightly higher ratio of male to female patients was seen in urban areas when compared with the rural areas (1.71:1 in the urban setting and 1.64:1 in the rural setting, with a P value of 0.823).</li> </ul>                                     |
| Lin et al, 2017 <sup>12</sup>        | Republic of Congo        | All patients presenting with a surgical condition                                        | Males 725 (60.1%), females 482 (39.9%)   | <ul style="list-style-type: none"> <li>• Female sex was associated with higher odds of postoperative complication (OR 3.45).</li> </ul>                                                                                                                                                       |
| Bohn et al, 2016 <sup>13</sup>       | Addis Ababa, Ethiopia    | All paediatric patients aged 29 days to 14 years admitted via emergency or hospital ward | Males 4078 (59.4%), females 2788 (40.6%) | <ul style="list-style-type: none"> <li>• The proportion of male admissions was significantly higher than female admissions in all age groups (p&lt;0.0001).</li> </ul>                                                                                                                        |
| Ahmad et al, 2015 <sup>14</sup>      | Pakistan                 | Patients aged >50 years from fishing communities in Kemari undergoing cataract surgery   | Males 58 (40.0%), females 87 (60.0%)     | <ul style="list-style-type: none"> <li>• Women experienced substantially worse visual outcomes than men.</li> <li>• Compared with men, women were 4.38 times more likely to have borderline or poor visual outcome.</li> </ul>                                                                |
| Tanchangya et al, 2015 <sup>15</sup> | Bangladesh               | All cataract surgery patients                                                            | Males 6513 (58.3%), females 4661(41.7%)  | <ul style="list-style-type: none"> <li>• The prevalence of cataract was higher in women than in men, indicating a greater need of treatment for women. Yet, more males than females received surgical treatment.</li> </ul>                                                                   |
| Segev et al, 2009 <sup>16</sup>      | United States of America | Patients on Medicare with end-stage renal disease requiring transplantation              | -                                        | <ul style="list-style-type: none"> <li>• Women had 11% less access to transplantation than men.</li> </ul>                                                                                                                                                                                    |

OR: odds ratio.

among women.<sup>12</sup> For any given indication, female gender was associated with higher odds of postoperative complications than males (odds ratio [OR] 3.45).<sup>12</sup> This could be attributed to women presenting late with more advanced disease, impacting their prognoses. Compared to men, female patients had more delayed presentation (adjusted mean difference [AMD] 5.67 days, p=0.05), delayed surgical intervention (AMD 1.91 days, p=0.02), and prolonged length of hospital stay (AMD 1.67 days, p=0.05).<sup>10</sup> Women undergoing cataract surgery were also more likely to present late compared to men, translating into worse ophthalmologic complications.<sup>14</sup> In line with these implications and higher proportions of women in LMICs, recognising and rectifying these gender disparities is warranted.

## Challenges and the way forward

Challenges experienced by women in access to quality surgical care can be

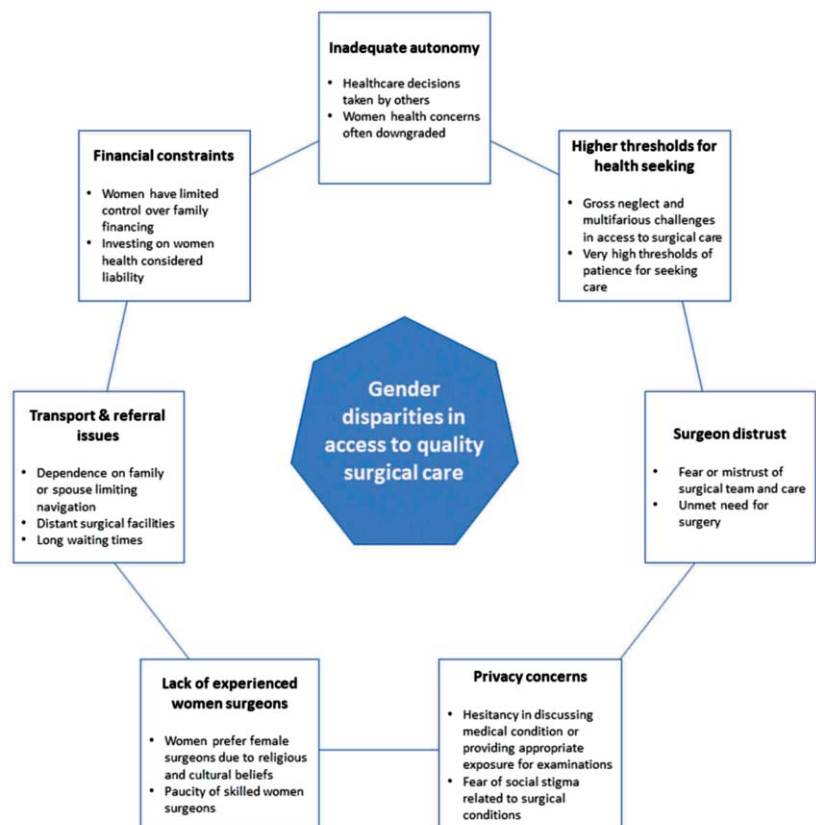**Figure:** Mind-map of challenges faced by women seeking surgical care in resource-limited settings.

classified under the following domains: inadequate autonomy, financial constraints, transport and referral issues, lack of experienced women surgeons, privacy concerns, surgeon distrust, and higher thresholds for seeking care (Figure).

**Inadequate autonomy:** Gender-based differences in surgical care seeking stem from pre-existing sociocultural barriers.<sup>18</sup> In LMICs, women are often not equipped with adequate autonomy to take decisions regarding their own health. Instead, such decisions are mostly taken by the patient's husband, father, or mother-in-law.<sup>19</sup> In such cases, health concerns of women are often downgraded, and they present to hospital with advanced diseases, complicating their prognoses. This is further strengthened by evidence from India suggesting that women autonomous in their health decisions are more likely to seek care.<sup>20</sup> While direct evidence is limited, this scenario might be more pronounced in access to surgical care.

Autonomy in healthcare decisions has been associated with higher education, employment, exposure to media and awareness, and better household economic status.<sup>21</sup> Education continues to be a significant predictor of surgical care-seeking, owing to better awareness among women and increased financial stability to support their decisions.<sup>20</sup> Therefore, sustainable efforts targeted at educating and empowering women in LMICs can alleviate the gender disparities in surgical care. This can be achieved with a combination of both short-term solutions, such as implementing national distance learning programmes via radio, television and social media to educate women, and long-term solutions aimed at the establishment of schools particularly in rural and underprivileged areas.

**Financial constraints:** In most LMICs, financial implications of surgical care are borne through out-of-pocket expenditures.<sup>22</sup> This can disproportionately impact women, majority of whom are responsible for managing household only with limited control over family financing.<sup>23</sup> In addition, investing in women healthcare has traditionally been considered a liability due to longstanding gendered norms.<sup>24</sup> This situation necessitates the development of sustainable and efficient health financing initiatives by governmental regulatory bodies.<sup>25</sup> Monetary and logistical support from international community and health organisations can further improve the status quo for women requiring surgical care in LMICs. In addition, targeted efforts are required to increase job opportunities for women, making them more financially independent to take their own healthcare-related decisions.

**Transport and referral issues:** Another challenge faced by women seeking surgical care is navigating through the healthcare system. Because of their dependence on families or spouses, women usually require others to accompany them through the process. However, in cases of limited support from families, surgical care becomes more inaccessible for women, depriving them of timely surgical management.<sup>24</sup> Similar delays can also result from inefficient referral systems, which are widespread in LMICs. Compared to men, more women seeking surgical care reported long waiting times (22% vs 33%). In addition, distance to facilities capable of providing essential surgical care also impact women disproportionately (87% of women vs 81% of men).<sup>24</sup>

Such structural problems need to be addressed by expediting procedures at basic healthcare units and improving the infrastructure to provide better referral options.<sup>26</sup> Basic health units (BHUs) are often understaffed and require expansion of the existing healthcare force to be more efficient in providing timely referrals. To accompany women to surgical facilities, the authorities could employ non-healthcare personnel or establish volunteer services, which have proved successful in high-income countries (HICs).<sup>24</sup> In addition, women-only bus services can be introduced nationally to provide convenient, affordable, and secure transport options to women.

**Lack of experienced women surgeons:** As a result of religious and cultural beliefs, women often prefer female surgeons while seeking surgical care.<sup>27</sup> However, there is a paucity of skilled women surgeons in LMICs owing to an array of disparities faced by women surgeons.<sup>28,29</sup> First, the work environment is unfavourable for women with inadequate support for pregnancy and parenting, limited mentorship and sponsorship opportunities, widespread harassment, negative perceptions among the surgical community and patients, poor surgical identity, and limited opportunities for career advancement and leadership. Second, the surgical sphere is dominated by males, resulting in the exclusion of women from potential career development opportunities unless they conform to male standards. Lastly, women surgeons are hindered by societal pressures secondary to long-standing stereotypes and inordinate work-life expectations and conflicts.<sup>29</sup> Rectifying these disparities is imperative to incentivising more women to opt for surgical fields, which can in turn improve the health-seeking behaviour among women.

**Privacy concerns:** In various large-scale hospitals, a high turnover of patients may compromise privacy. This can contribute towards hesitancy among women in

discussing their medical condition or providing appropriate exposure for physical examination among multiple patients in the ward.<sup>24</sup> Providing privacy during consultations could reduce patient discomfort, while also allowing the surgeons to take more accurate histories. Obtaining informed consent before proceeding with physical examinations and appropriately covering the patients can further improve patient comfort and strengthen the patient-physician relationship. Women also reported of being afraid of social stigma related to their surgical condition.<sup>24</sup> This mandates that surgeons uphold the notion of doctor-patient confidentiality and ensure safeguarding of all hospital records to gain the confidence of their patients.<sup>24</sup> In addition, regular audits are required to investigate potential breaches of doctor-patient confidentiality, and a zero-tolerance policy towards such breaches should be institutionalised.

**Surgeon distrust:** Another challenge contributing to the unmet need for surgery among women is surgeon distrust. Fear or mistrust of surgical care was reported by 42% of women seeking surgical care in Ghana.<sup>24</sup> Re-establishing surgeon-patient trust is imperative, and can be achieved with surgeons providing reassurance to patients, allowing them to ask questions, explaining their laboratory results, avoiding being judgmental of patients, and involving patients in decision-making related to their care.<sup>30</sup>

**Higher thresholds for seeking care:** In line with gross neglect and the various challenges highlighted, women have also developed very high thresholds of patience for seeking care.<sup>31</sup> Because of this, women often have delayed presentation with more advanced diseases compared to men, and are subsequently more likely to have poorer prognoses.<sup>10</sup>

## Conclusion

Women seeking surgical care are burdened with significant gender disparities, particularly in LMICs. While research has revealed the underlying causes of these disparities, much work remains for governmental healthcare bodies, the international community, surgical leadership, policymakers, and the family members of patients to act on the highlighted issues. Appropriate policies and programmes are necessary to ensure equitable delivery of surgical care for both genders, particularly in cases where differential surgical needs exist among men and women. Unrestricted access to quality surgical care for all is of vital importance, and such efforts can translate into a significant decrease in preventable disabilities and deaths among women in resource-constrained settings.

**Disclaimer:** None.

**Conflict of Interest:** None.

**Source of Funding:** None.

## References

1. Meara JG, Leather AJ, Hagander L, Alkire BC, Alonso N, Ameh EA, et al. Global Surgery 2030: evidence and solutions for achieving health, welfare, and economic development. *Lancet* 2015;386:569-624. doi: 10.1016/S0140-6736(15)60160-X.
2. Alkire BC, Raykar NP, Shrima MG, Weiser TG, Bickler SW, Rose JA, et al. Global access to surgical care: a modelling study. *Lancet Glob Health* 2015;3:e316-23. doi: 10.1016/S2214-109X(15)70115-4.
3. Agency for Healthcare Research and Quality (AHRQ). Healthcare Quality and Disparities in Women: Selected Findings From the 2010 National Healthcare Quality and Disparities Reports. [Online] 2014 [Cited 2021 September 12]. Available from URL: <https://archive.ahrq.gov/research/findings/nhqrdr/nhqrdr10/women.html>.
4. The Joint United Nations Programme on HIV and AIDS (UNAIDS). Prevention gap report. [Online] 2016 [Cited 2021 September 12]. Available from URL: <https://www.unaids.org/en/resources/documents/2016/prevention-gap>.
5. Whitehead M. The concepts and principles of equity and health. *Int J Health Serv* 1992;22:429-45. doi: 10.2190/986L-LHQ6-2VTE-YRRN.
6. Shrima MG, Dare AJ, Alkire BC, O'Neill K, Meara JG. Catastrophic expenditure to pay for surgery worldwide: a modelling study. *Lancet Glob Health* 2015;3(Suppl 2):s38-44. doi: 10.1016/S2214-109X(15)70085-9.
7. Meara JG, Leather AJ, Hagander L, Alkire BC, Alonso N, Ameh EA, et al. Global Surgery 2030: evidence and solutions for achieving health, welfare, and economic development. *Int J Obstet Anesth* 2016;25:75-8. doi: 10.1016/j.jjoa.2015.09.006.
8. Shrima MG, Bickler SW, Alkire BC, Mock C. Global burden of surgical disease: an estimation from the provider perspective. *Lancet Glob Health* 2015;3(Suppl 2):s8-9. doi: 10.1016/S2214-109X(14)70384-5.
9. Khattab H, Younis N, Zurayk H. Women, Reproduction, and Health in Rural Egypt: The Giza Study. Cairo, Egypt: The American University in Cairo Press; 1999.
10. Reid TD, Wren SM, Grudziak J, Maine R, Kajombo C, Charles AG. Sex Disparities in Access to Surgical Care at a Single Institution in Malawi. *World J Surg* 2019;43:60-6. doi: 10.1007/s00268-018-4775-7.
11. Chhabra ST, Masson S, Kaur T, Gupta R, Sharma S, Goyal A, et al. Gender bias in cardiovascular healthcare of a tertiary care centre of North India. *Heart Asia* 2016;8:42-5. doi: 10.1136/heartasia-2015-010710.
12. Lin BM, White M, Glover A, Wamah GP, Trotti DL, Randall K, et al. Barriers to Surgical Care and Health Outcomes: A Prospective Study on the Relation Between Wealth, Sex, and Postoperative Complications in the Republic of Congo. *World J Surg* 2017;41:14-23. doi: 10.1007/s00268-016-3676-x.
13. Bohn JA, Kassaye BM, Record D, Chou BC, Kraft IL, Purdy JC, et al. Demographic and mortality analysis of hospitalized children at a referral hospital in Addis Ababa, Ethiopia. *BMC Pediatr* 2016;16:168. doi: 10.1186/s12887-016-0709-4.
14. Ahmad K, Zwi AB, Tarantola DJ, Soomro AQ, Baig R, Azam SI. Gendered Disparities in Quality of Cataract Surgery in a Marginalised Population in Pakistan: The Karachi Marine Fishing Communities Eye and General Health Survey. *PLoS One* 2015;10:e0131774. doi: 10.1371/journal.pone.0131774.
15. Tanchangya J, Khan RA, Bayasakh S, Wichaidit W. Gender disparity

- in delayed treatment-seeking behavior for cataract: 6 years of experience from Impact Jibon Tari Floating Hospital, Bangladesh. *Asia Pac J Public Health* 2015;27:NP240-7. doi: 10.1177/1010539512437402.
16. Segev DL, Kucirka LM, Oberai PC, Parekh RS, Boulware LE, Powe NR, et al. Age and comorbidities are effect modifiers of gender disparities in renal transplantation. *J Am Soc Nephrol* 2009;20:621-8. doi: 10.1681/ASN.2008060591.
  17. Billig JI, Sterbenz JM, Zhong L, Chung KC. Gender Disparities in Preoperative Resource Use for Wrist Arthroscopy. *Plast Reconstr Surg* 2018;142:1267-74. doi: 10.1097/PRS.0000000000004840.
  18. Grimes CE, Bowman KG, Dodgion CM, Lavy CB. Systematic review of barriers to surgical care in low-income and middle-income countries. *World J Surg* 2011;35:941-50. doi: 10.1007/s00268-011-1010-1.
  19. Parkhurst JO, Rahman SA, Ssengooba F. Overcoming access barriers for facility-based delivery in low-income settings: insights from Bangladesh and Uganda. *J Health Popul Nutr* 2006;24:438-45.
  20. Nayak N, Varambally KVM. Impact of autonomy on health-seeking behaviour: Evidence from rural India. *J Health Manag* 2017;19:109-20. Doi: 10.1177/0972063416682889
  21. Wado YD. Women's autonomy and reproductive health-care-seeking behavior in Ethiopia. *Women Health* 2018;58:729-43. doi: 10.1080/03630242.2017.1353573.
  22. Oudmane M, Mourji F, Ezzrari A. The impact of out-of-pocket health expenditure on household impoverishment: Evidence from Morocco. *Int J Health Plann Manage* 2019;34:e1569-85. doi: 10.1002/hpm.2848.
  23. Lewallen S, Courtright P. Gender and use of cataract surgical services in developing countries. *Bull World Health Organ* 2002;80:300-3.
  24. Gyedu A, Abantanga F, Boakye G, Gupta S, Otupiri E, Agbeko AE, et al. Barriers to essential surgical care experienced by women in the two northernmost regions of Ghana: a cross-sectional survey. *BMC Womens Health* 2016;16:27. doi: 10.1186/s12905-016-0308-4.
  25. Alawode GO, Adewole DA. Assessment of the design and implementation challenges of the National Health Insurance Scheme in Nigeria: a qualitative study among sub-national level actors, healthcare and insurance providers. *BMC Public Health* 2021;21:124. doi: 10.1186/s12889-020-10133-5.
  26. Luxon L. Infrastructure - the key to healthcare improvement. *Future Hosp J* 2015;2:4-7. doi: 10.7861/futurehosp.2-1-4.
  27. Ghumro AA, Khaskheli NM, Memon AA, Ansari AG, Awan MS. Clinical profile of patients with breast cancer. *J Coll Physicians Surg Pak* 2002;12:28-31.
  28. Liang R, Dornan T, Nestel D. Why do women leave surgical training? A qualitative and feminist study. *Lancet* 2019;393:541-9. doi: 10.1016/S0140-6736(18)32612-6.
  29. Stephens EH, Heisler CA, Temkin SM, Miller P. The Current Status of Women in Surgery: How to Affect the Future. *JAMA Surg* 2020;155:876-85. doi: 10.1001/jamasurg.2020.0312.
  30. Dang BN, Westbrook RA, Njue SM, Giordano TP. Building trust and rapport early in the new doctor-patient relationship: a longitudinal qualitative study. *BMC Med Educ* 2017;17:32. doi: 10.1186/s12909-017-0868-5.
  31. Kapoor M, Agrawal D, Ravi S, Roy A, Subramanian SV, Guleria R. Missing female patients: an observational analysis of sex ratio among outpatients in a referral tertiary care public hospital in India. *BMJ Open* 2019;9:e026850. doi: 10.1136/bmjopen-2018-026850.
-
